# Supplementary material for: Body Weight Perception and Misperception Among Jordanian Adults Living with Diabetes
Source: Research Square preprint supplement (doi:10.21203/rs.3.rs-8294505/v1), 2026-01-16
Supplement: Supplementary file 1 [file 4bff973102a786b24ff73f15.docx]

**Highlights**

- Many with diabetes misjudge their body size, often underestimating
- Women more often seek body shape change and adjust diet successfully
- Normal weight seen as healthiest; severe obesity seen as unhealthiest
- Family and culture shape ideals toward normal or slight overweight
- Figure Rating Scale links perceived and actual body size in diabetes
